# Supplementary material for: Identification of regions with a robust increase of heavy precipitation events
Source: Copernicus journal article supplement (doi:10.5194/egusphere-2023-552), 2023-04-03
Supplement: Supplementary file [file egusphere-2023-552-AC1-supplement.pdf]

Authors reply to Referee 1:

Thank you very much for your comments.

1. Referee comment and authors answer

Referee1: "The topic investigated in this study is pertinent and crucial given the rise in extreme events caused by climate change. However, as the impacts of extreme precipitation over Europe using EURO-CORDEX RCMs have been examined in multiple previous studies, a new study in this field must address a critical knowledge gap to justify publication. While some of the previous studies were cited, others, such as a recent study by Ritzhaupt and Maraun (2022) identifying robust and conflicting projections of mean and extreme precipitation across Europe using different ensembles of climate models (ENSEMBLES and EURO-CORDEX RCMs, HighresMIP, and CMIP3, CMIP5, and CMIP6 GCMs), were not mentioned. Another study by Dosio and Fischer (2017) investigated the robustness of changes in extreme precipitation in Europe using EURO-CORDEX RCMs under different global warming levels. Given the existing knowledge in the literature, the objective of this study may be too narrow to justify publication in NHESS."

Authors: We sincerely appreciate your efforts in pointing out the two articles and highlighting the fact that we did not emphasize our unique points sufficiently. By incorporating these citations into our introduction, comparison, and discussion, we can enhance the strength of our article. We believe that our study makes significant contributions by addressing the following critical knowledge gaps and modifying certain aspects:

a) Ensuring consistency in simulations: A key aspect that distinguishes our research is the rigorous commitment to maintaining consistency in our simulations. We diligently avoid using a mixture of simulations with different configurations and quality levels. By adhering to a consistent set of simulations, we significantly reduce variance, enhance the significance and robustness of our findings, and thereby strengthen the overall reliability of our results. This meticulous approach guarantees the integrity of our study and strengthens the validity of our conclusions.

b) Integration of different methods and metrics: We have employed various methods and metrics in our analysis, and our study presents a combined analysis of their results. This comprehensive approach provides a more thorough understanding of robust changes in heavy and extreme precipitation.

c) Estimating the significance of climate change: Our study quantifies the proportion of land area in individual subregions that will be robustly affected by robust climate change. This assessment helps in determining the significance of potential climate change for these regions, and thus, enhancing our understanding of the impacts.

d) Discussing result uncertainty: We address the potential uncertainty of results in areas where the full ensemble does not adequately represent observed conditions. Instead of solely comparing simulated extremes with reference data based on absolute or relative differences, we demonstrate instances where the reference data lie outside the entire range of the simulation ensemble.

e) Choice of reference period: To exclude the influence of the rising climate change in the 1980s to 1990s, we have chosen the period 1951-1980 as our reference period. This selection enables us to capture the maximum expected increase along the simulation period.

f) Importance of quantifying regional development: A significant challenge in discussing expected future climate changes is reliably quantifying the regional development of extreme precipitation related to global climate change. Our study acknowledges this challenge and emphasizes the necessity of additional studies that consolidate, improve, or validate these expected changes. Such studies help to narrow the range of future climate changes and identify the areas that will be affected by them.

By addressing these knowledge gaps and modifying certain aspects, our research stands out in terms of the consistency of simulations, integrated analysis, estimation of significance, discussion of result uncertainty, choice of reference period, and contribution to the broader discussion of future climate changes. We firmly believe that these distinct features warrant the publication of our work.

What is new or different in Ritzhaupt and Maraun (2023) and Dosio and Fischer (2018) compared to our study?

We would like to note that Ritzhaupt and Maraun's study was published when we finalized our article so that we unfortunately and unintentionally overlooked their publication. Ritzhaupt and Maraun's study differs from ours in several aspects. Firstly, they incorporate a mixture of all available ensembles, including global, regional, and varying resolutions, degrees of development, and time periods for comparison. In contrast, our analysis deliberately focuses exclusively on the most recent regional simulations from the Euro-CORDEX ensemble.

Robustness is generally defined in different ways throughout the literature also in the mentioned two articles by Ritzhaupt and Maraun (2023) and Dosio and Fischer (2018). In our approach, robustness is determined by combining a strong agreement in sign and a majority of statistically significant changes. This definition is similar but not identical to that of Dosio and Fischer. We give priority to sign agreement and require that at least 50% of the matched simulations exhibit statistically significant changes. Furthermore, we concentrate solely on the highest level of robustness and do not differentiate between "large" and "small" robustness categories. Instead, we analyze fixed time periods that specifically pertain to medium and severe climate changes, without focusing on weaker changes within the global warming range up to +2°C.

We believe that the reference period used in Dosio and Fischer's study (1981-2010) is too late, as it already encompasses a significant portion of observable climate change that began in the late 1980s. Interestingly, Dosio himself acknowledges in the discussion that an earlier reference period could yield different results.

We will extend the discussion in our study by a detailed examination of the method of robustness and a comparative analysis with Dosio and Fischer's findings, with a particular emphasis on contrasting summer and winter changes. We will also incorporate a comparison with the general findings by Ritzhaupt and Maraun (2023).

## 2. Referee comment and authors answer

Referee: "The authors mentioned that block maxima (BMM) is associated with high statistical uncertainty in extreme value analysis, and therefore used the peak-over-threshold (POT) method in their analysis. This was due to the short time period of their analysis (30 years). However, looking at Fig. 5 of Tabari (2021), it is clear that the difference between

BMM and POT methods for projected changes in extreme precipitation in terms of magnitude and spatial distribution is very small for Europe.“

Authors:

Our test calculations in selected regions have shown that the Pareto Return Values are consistently larger than the GEV Return Values, a finding that aligns with Tabari (2021) and his referenced sources. These studies mention that the BMM method is easier to use and implicitly guarantees the statistical independence of the considered extreme values, but also emphasize some shortcomings, especially for short time periods (see citation below). Despite the relatively minor disparities observed between the Peaks-over-Threshold (PoT) and Block Maxima (BMM) methods for Europe, we have chosen to apply the PoT method because of the advantages of the PoT for short time periods (see citation below), despite its difficulties like finding the right threshold and additionally taking care of statistically independent extreme events. Furthermore, we have computed the 100-year return value, and according to Tabari (2021) the discrepancy between PoT and BMM becomes more pronounced with higher return periods (see citation below). However, it is crucial to emphasize that the difference observed for Europe is not significantly substantial.

Citation: Tabari (2021) [“The major advantages of the BM method are its simplicity and the independence of extracted extremes. Its main shortcoming is that it samples only one event per year which may result in a loss of information as other events than the maximum of a year may exceed the annual maxima of other years. It is particularly problematic when the data record is short (i.e., small sample size). Another drawback of the BM method is the inclusion of some lower observations that are still the maximum value in the year (annual maxima in dry years). Annual maximum precipitation depths of coarse time-resolutions can also be potentially underestimated (Hershfield, 1961, Weiss, 1964, Young and McEnroe, 2003, Yoo et al., 2015, Morbidelli et al., 2017, Morbidelli et al., 2018, Morbidelli et al., 2020).”]

Citation: Tabari (2021) [“The POT method supplies a larger sample size for a more precise distribution parameter approximation compared to the BM method which chooses a single maximum event in each year (Lang et al., 1999). It also functions properly in the case of an asymmetric distribution tail (McNeil and Frey, 2000). However, the use of the POT method involves some analytical complexities, including choosing an appropriate threshold level for extreme events and assuring the independence of extremes.“]

Citation: Tabari (2021) [“A comparison between global median changes in extreme precipitation intensity with return periods ranging from 2 to 50 years derived from the BM and POT methods for the whole year shows almost same changes up to the return period of 15 years (Fig. 1). For the return periods of longer than 15 years, the ensemble multi-model medians for the BM and POT methods diverge, with slightly larger BM-based changes (up to 2.5% for a 50-year return period).”]

### 3. Referee comment and authors answer

Referee: “The end of the 21st century (2070-2099) was used for future climate, and the period 1951-1980 was used as the reference period. However, this reference period is not representative of either the current past or the pre-industrial era. The periods 1971-2000 or

1976-2005 are commonly used for climate change studies using EURO-CORDEX RCMs and using these periods facilitates a comparison of the results with previous studies. “

Authors: The reference period of 1951-1980 was deliberately chosen because it precedes the noticeable and significant regional climate changes that occurred in the late 1980s and 1990s. This period corresponds to the decades of economic reconstruction following World War II and represents a time of relatively minimal transient (stationary) climate change. In contrast, the period from 1971 to 1990 encompasses the most noticeable increase in climate change, particularly during the 1980s and 1990s.

This selection provides an advantage over Dosio and Fischer's reference period of 1981-2010, which is already influenced by strong climate changes. By utilizing the reference period of 1951-1980, we align closely with Ritzhaupt and Maraun, who also employed an early period in their analysis of the HighresMIP ensembles.

We will add a justification in our study why we have chosen this reference time.

#### 4. Referee comment and authors answer

Referee: “The authors used 26 and 14 simulations, respectively, for the RCP8.5 and RCP4.5 scenarios. Therefore, the difference in projected changes between the two scenarios may be due in part to their significantly different number of simulations.”

Authors: Despite potential variations stemming from the number of simulations conducted, we employed a bootstrap test to determine the minimum number of members required for a grid-point to exhibit robustness under the RCP8.5 scenario. The robust area fraction becomes stable from 10-15 ensemble members depending on region. We also repeated our analysis for the RCP8.5 scenario with a reduced ensemble, where we considered only the same GCM-RCM combinations as used for the RCP4.5 scenario. The relative deviation between the climate change from the reduced and full ensemble is less than 5% for most parts of the model domain apart IP and MD, where the robustness is weak at all.

Our finding aligns with previous studies that have also observed stronger and more robust characteristics associated with the RCP8.5 scenario compared to RCP4.5.

Furthermore, the study by Dosio and Fischer (2018) acknowledge the potential impact of ensemble size on robustness. However, they note that the results for different warming levels, such as 2°C warming computed using only the RCP8.5 runs, are similar to those obtained using the entire ensemble. This suggests that the influence of ensemble size on the results can be neglected above a certain number of members (about 10-15). Nonetheless, we will explicitly address the issue of different ensemble sizes in our study to ensure transparency in our analysis.

Citation: Dosio, A., & Fischer, E. M. (2018). [“The robustness as defined in our methodology is dependent on the models' ensemble size; the results for the 3°C warming are computed with a smaller ensemble compared to those for 1.5°C and 2°C warmings, which may affect the results. However, from a sensitivity analysis, it turns out that the results, for example, for 2°C warming computed using only the RCP8.5 runs are similar to those using the whole ensemble.”]

#### 5. Referee comment and authors answer

Referee: "The authors conducted trend analysis using the Sen slope estimator and tested its significance using the Mann-Kendall test. However, the existence of auto-correlation in time series can influence the results of these methods. For example, positive auto-correlation increases the chance of rejecting the null hypothesis of no trend and vice versa. It is unclear whether the authors checked for auto-correlation in the time series and, in the case of significant auto-correlation, whether its influence was taken into account in trend analysis methods."

Authors:

While Sen's method does not mention any specific issues related to autocorrelation. Helsel and Hirsch (2020) pointed out that ignoring autocorrelation can lead to an overestimation of the accuracy of any statistical estimates.

It is worth noting in this context that a certain degree of autocorrelation is inherent in any trend. A strict linear trend is always characterized by a significant and nearly linearly decreasing autocorrelation. Assessing the presence of autocorrelation in our data, we specifically examined the autocorrelation of annual values in some of the simulations. However, we did not find any significant and structured correlations. The resulting values exhibited the typical characteristics of a strongly noisy linear trend, with autocorrelation values consistently below 0.2 and no lag-dependent structure, except for a region in the northern Atlantic. This particular region displayed the most significant trend overall and exhibited higher autocorrelation values of up to 0.5 for lags between 2 to 4 years, which then decreased afterwards.

We add a corresponding comment on autocorrelation in the revised version.

Citation: Helsel, K., & Hirsch, R. M. (2020). [„One of the consequences of autocorrelation is that the accuracy of any statistical estimates will be overstated if this property is ignored”]
